# Supplementary material
Source: PubMed Central journal article supplement (PMC5267320)
Supplement: NIHMS838834-supplement-s.pdf [file NIHMS838834-supplement-s.pdf]

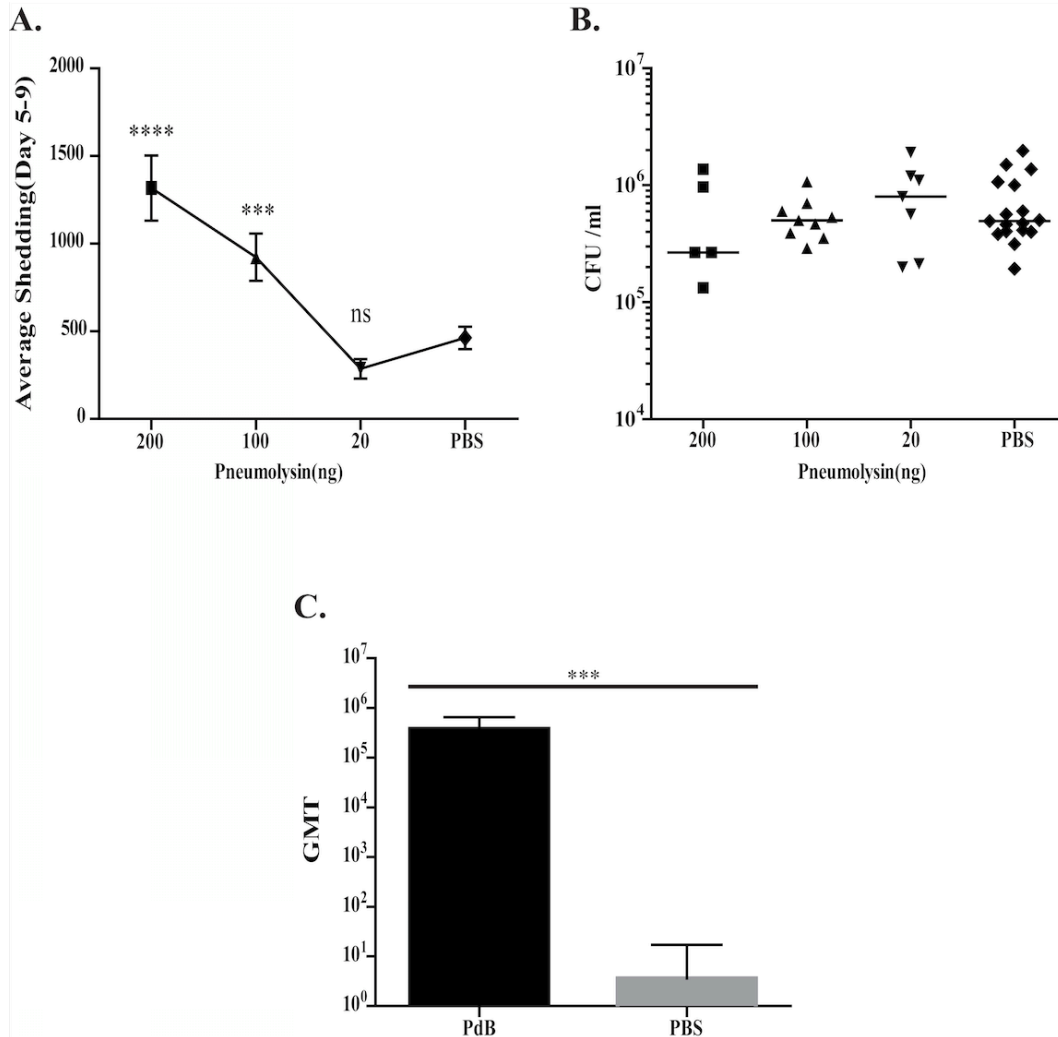

**Supplemental Fig. 1., related to Fig. 3 and Fig. 5, A-B.** WT pups were colonized at age 4 days with an inframe, unmarked deletion of the pneumolysin gene (*ply*<sup>-</sup>). **A)** Pups were given purified pneumolysin (Ply) IN each day at the dose indicated and shedding measured daily until sacrifice at age 9 days. Values are the mean/pup  $\pm$  SE (n=17). **B)** Colonization density in URT lavages obtained at age 9 days with the median value shown. **C)** Geometric mean titers (GMT) in serum of pups from PdB or PBS-control immunized dams with confidence interval indicated. (n=8).

\*\*\* $P < 0.001$ , \*\*\*\* $P < 0.0001$ .
